# Supplementary material
Source: PubMed Central journal article supplement (PMC2749794)
Supplement: mmc1.pdf [file mmc1.pdf]

Biophysical Journal, Volume 97

**Supporting Material**

**Induced  $\beta$ -Barrel Formation of the Alzheimer's A $\beta$ <sub>25-35</sub> Oligomers on Carbon Nanotube Surfaces: Implication for Amyloid Fibril Inhibition**

Zhaoming Fu, Yin Luo, Philippe Derreumaux, and Guanghong Wei

## Supporting Materials:

**Figure S1:** Analysis of a representative MD run (run 1) starting from a SWNT(3,3)-A $\beta$  octamer system with parallel arrangement of  $\beta$ -strands. (A) States at t=0 (left) and 10 ns (right); (B) Secondary structure of each residue in the eight chains as a function of time calculated using DSSP program.<sup>1</sup>

**Figure S2:** MD-generated decamer at t=10 ns in a MD (run 86) without SWNT starting from mixed parallel-antiparallel  $\beta$ -sheets.

**Figure S3:** Analysis of the assembly process of two pentameric  $\beta$ -sheets into a 10-stranded  $\beta$ -barrel structure on a SWNT(4,4) surface observed in run 68. Time evolution of: (A) total Rg and Rg-HP of the decamer; (B) number of inter-sheet backbone H-bonds; (C) number of intra-sheet backbone H-bonds (the black curve is a smoothed line over 20 data points); (D) backbone RMSD of the decamer with respect to the  $\beta$ -barrel structure generated at 10 ns.

**Figure S4:** Dehydration process of SWNT-A $\beta$ -decamer interface observed in Run 68. (A) Time evolution of number of water molecules within each cylinder along SWNT-axis. The cylinder is 1.0-nm thick from SWNT-axis and 0.5 nm high. (B) Four snapshots of SWNT(4,4)-water (view parallel to SWNT-axis) generated within the first 1 ns. To visualize the dehydration process clearly, the A $\beta$  decamer is omitted, a radius of 1 nm from the SWNT is drawn in dotted line, and only the water molecules within 2 nm thick from the SWNT-axis are displayed.

**Figure S5:** MD run starting from a new orientation of the two  $\beta$ -sheets relative to SWNT-axis. Here the C $\alpha$ -C $\alpha$  distances of the two ends are 1.73 nm and 3.85 nm, respectively. (A): the initial state and the open  $\beta$ -barrel generated at t=20 ns. (B): the time evolution of inter-sheet H-bond1 (between strands *d* and *e*), H-bond2 (between strands *a* and *h*), and C $\alpha$ -RMSD of the oligomer with respect to the open  $\beta$ -barrel formed at t=20 ns.

**Figure S6:** Time evolution of the C $\alpha$ -RMSD of the oligomer with respect to the closed  $\beta$ -barrel generated at t=80 ns in run 10.

## References:

1. Kabsch, W.; Sander, C. *Biopolymers* **1983**, *22*, 2577-637.

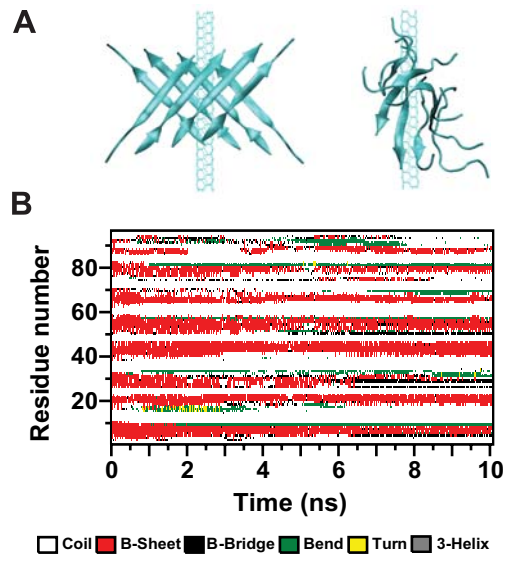

Figure S1

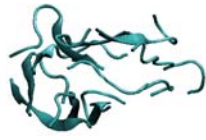

Top view

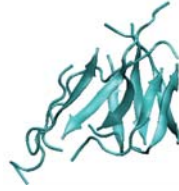

Side view

Figure S2

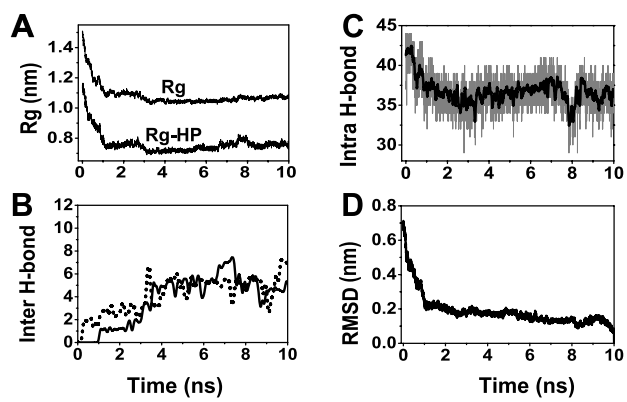

Figure S3

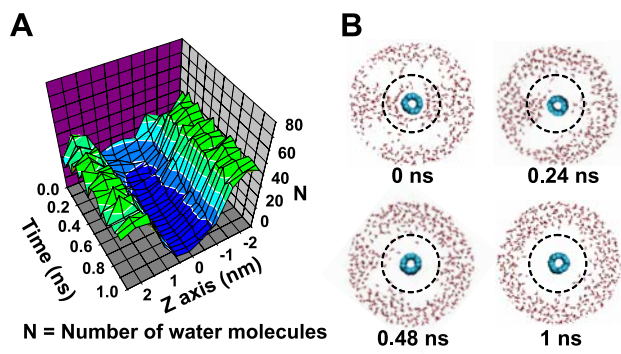

Figure S4

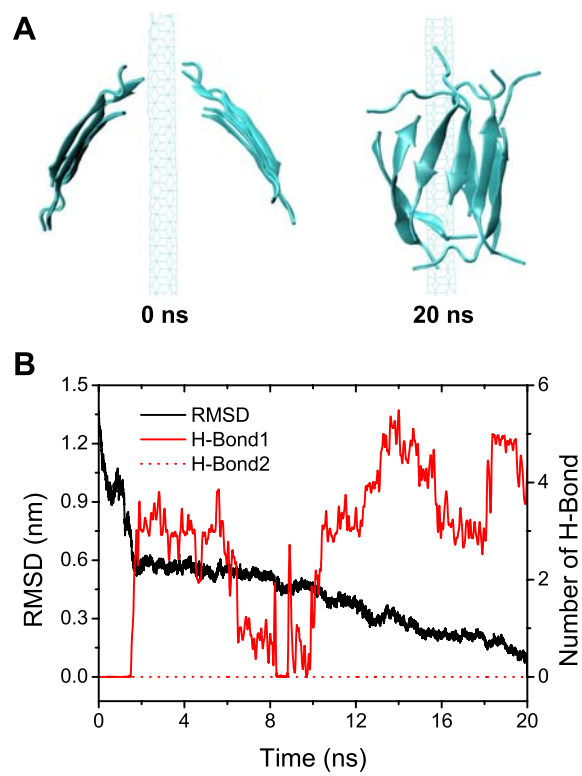

**Figure S5**

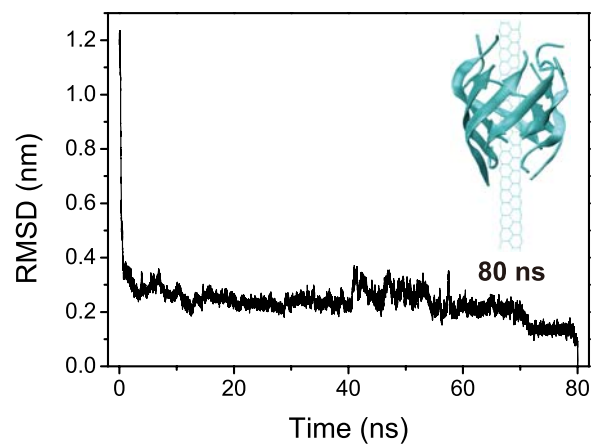

**Figure S6**
